# Supplementary material for: Computational Insights into the Binding Mechanism of OxyS sRNA with Chaperone Protein Hfq
Source: MDPI journal article supplement (doi:10.3390/biom11111653), 2021-11-08
Supplement: s1 [file s1]

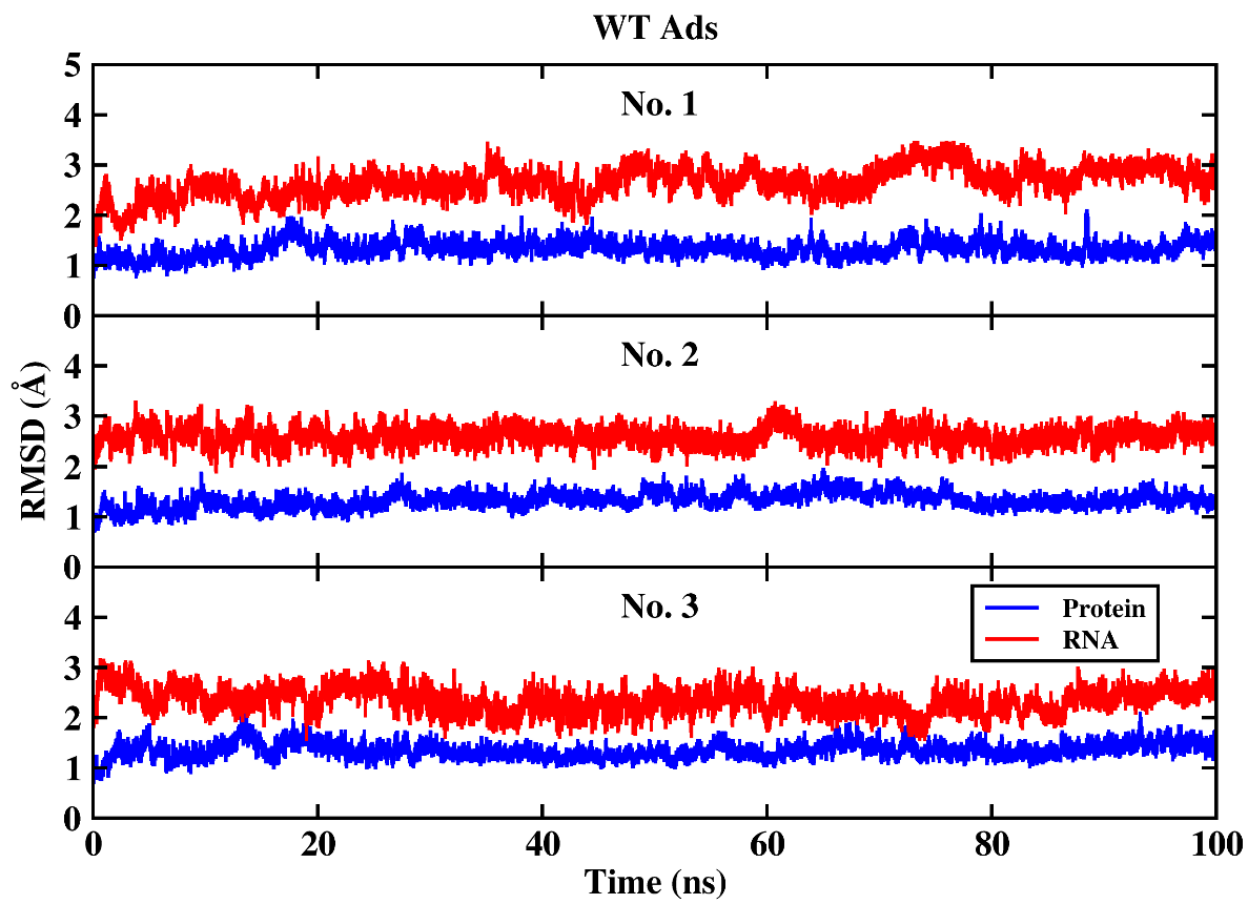

Figure S1. Protein and RNA RMSD of the Ads system from three simulations.

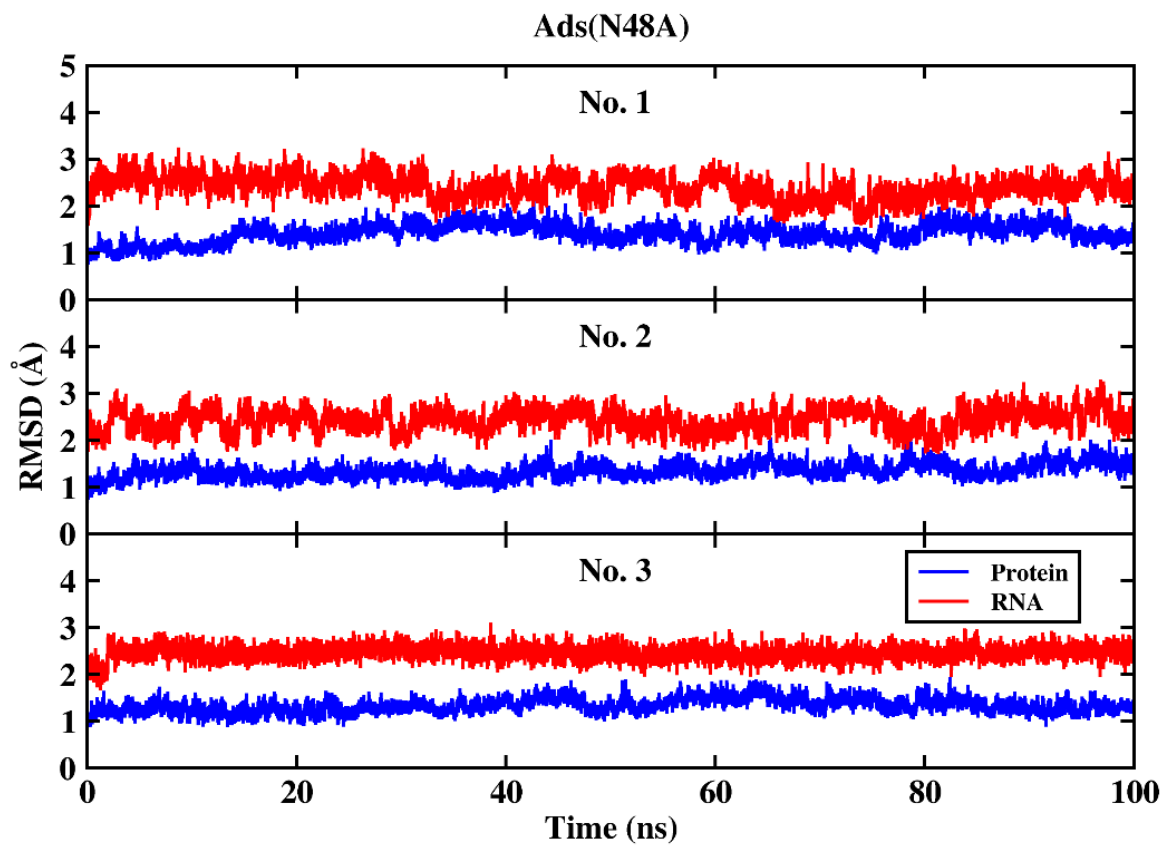

Figure S2. Protein and RNA RMSD of the Ads(N48A) system from three simulations.

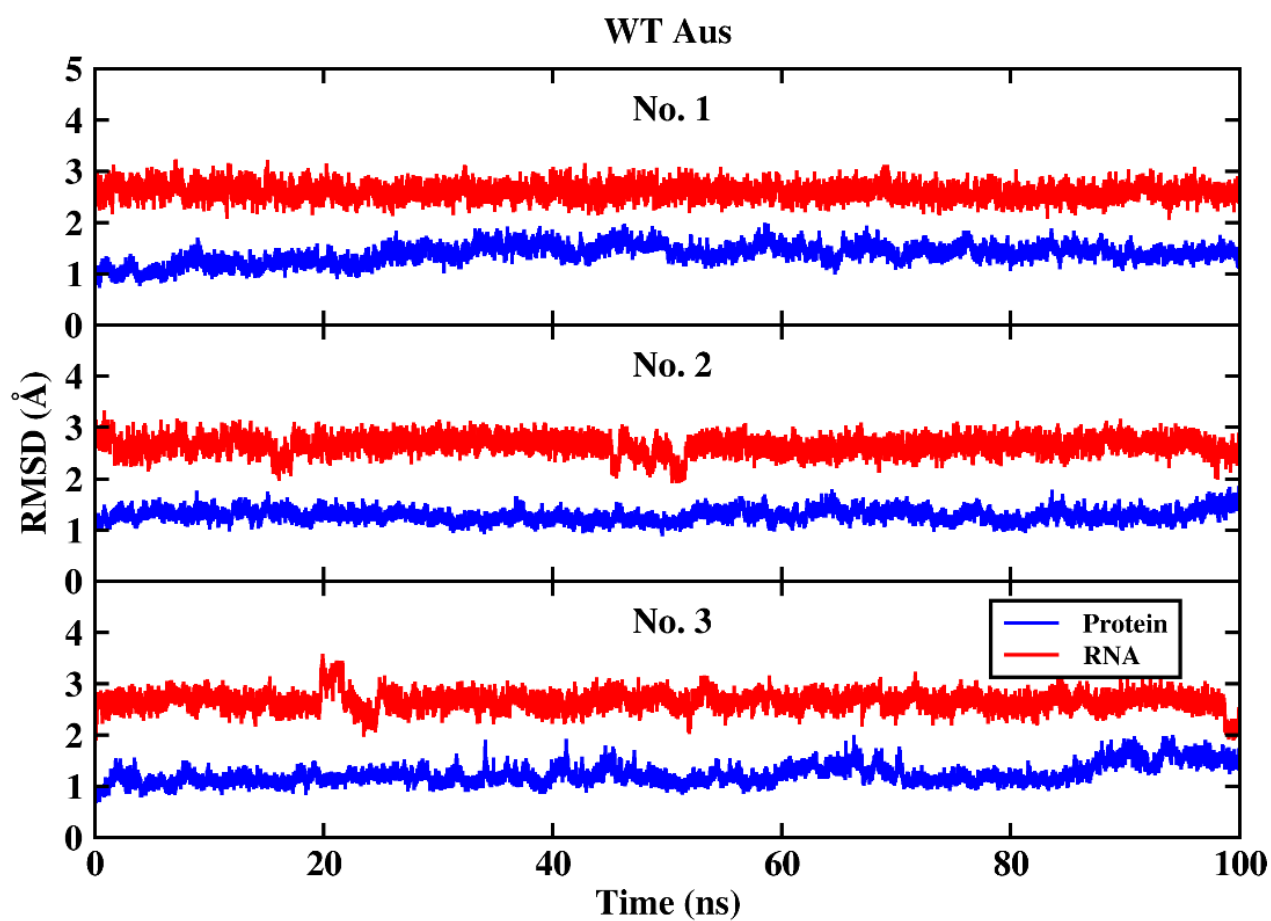

**Figure S3.** Protein and RNA RMSD of the Aus system from three simulations.

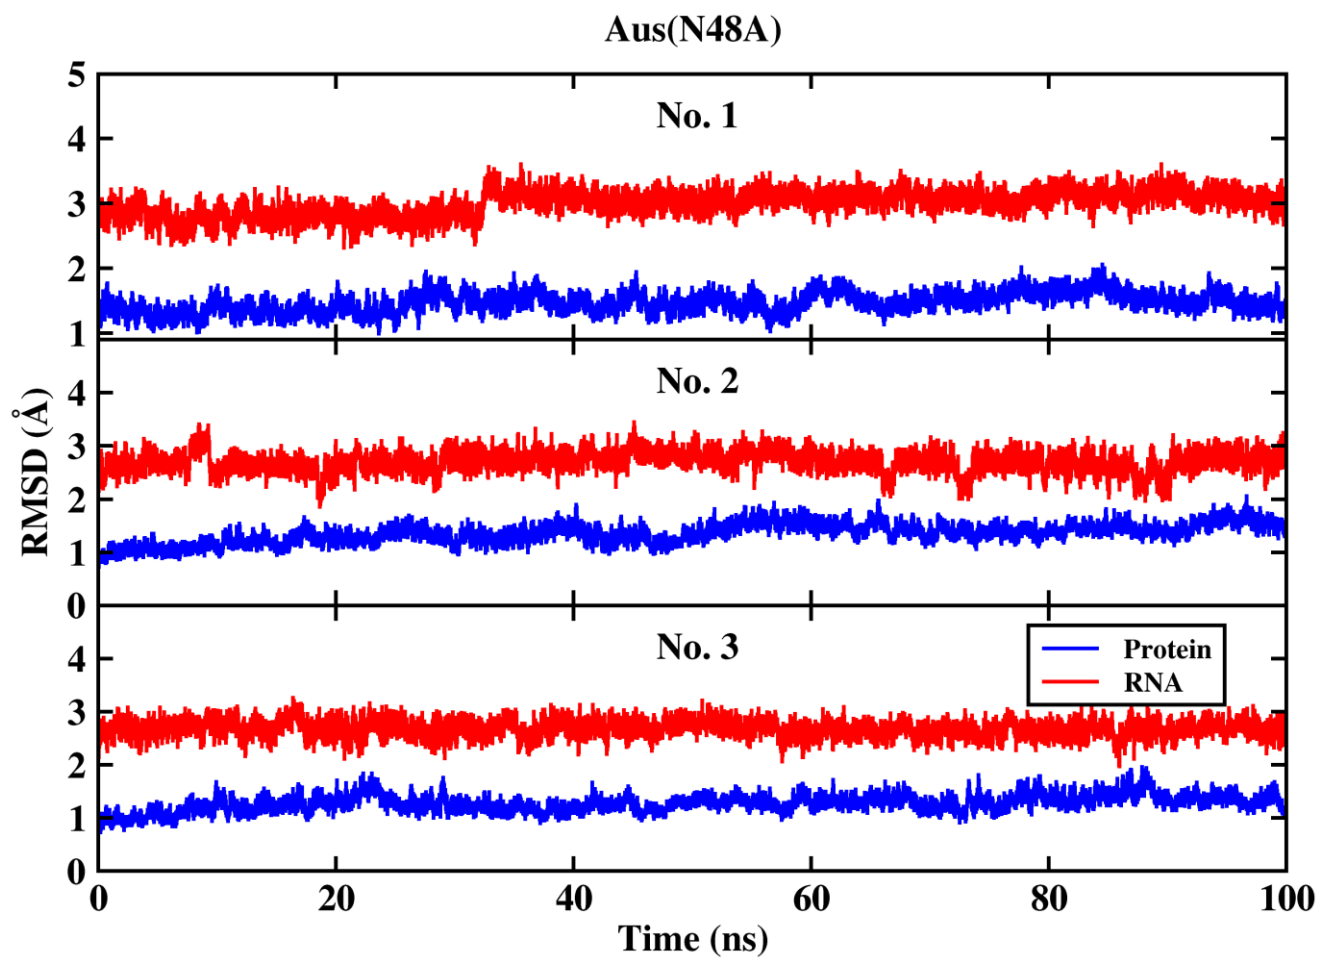

**Figure S4.** Protein and RNA RMSD of the Aus(N48A) system from three simulations.

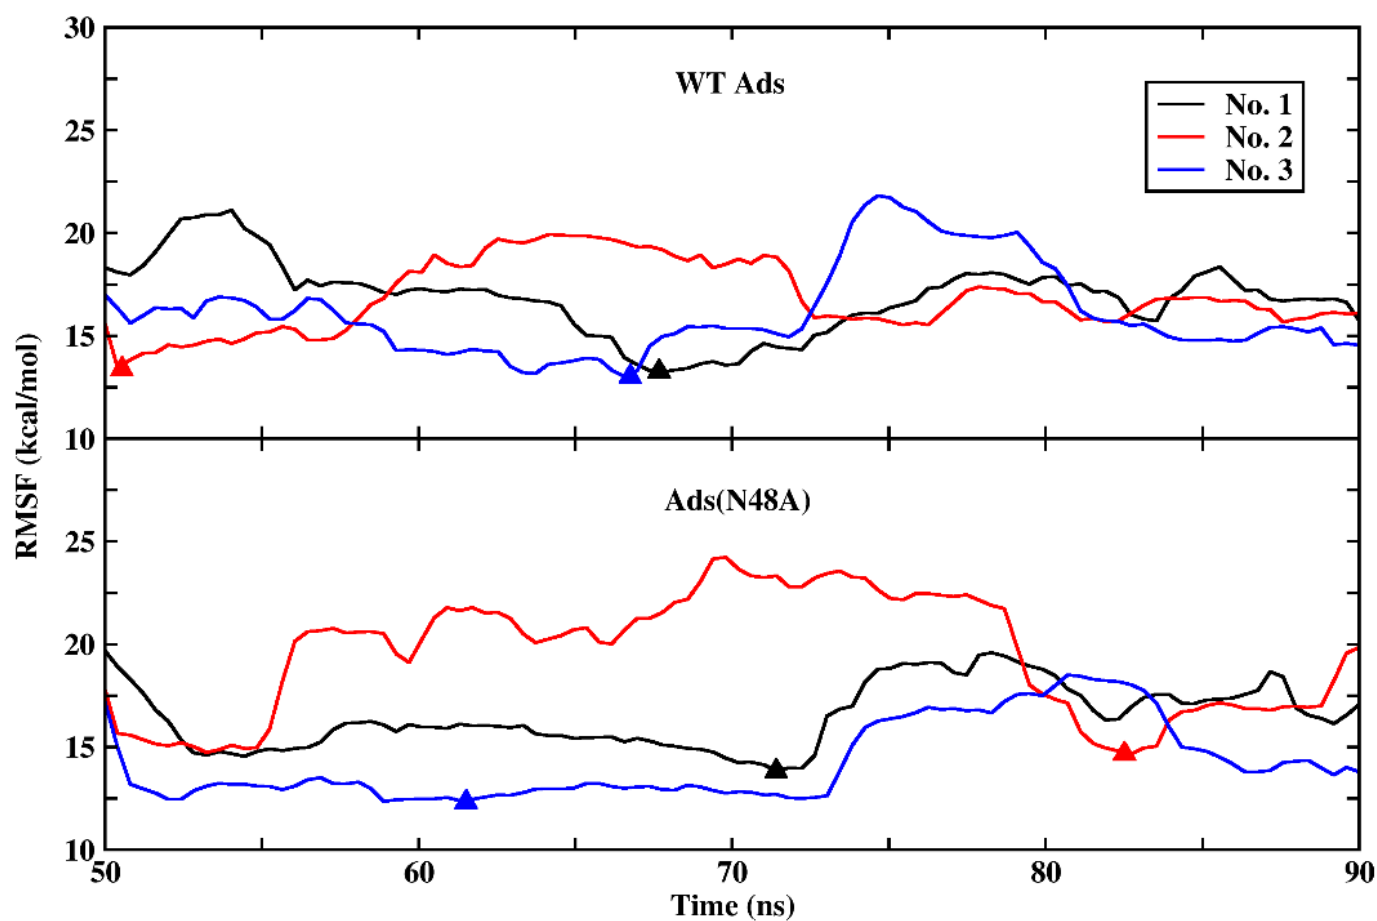

**Figure S5.** The RMSF of gas phase interaction energy of 10-ns sliding window in the last 50 ns for Ads and Ads(N48A) systems. The x-axis represents the start time of a 10-ns window. The windows with the smallest RMSF are marked with triangles.

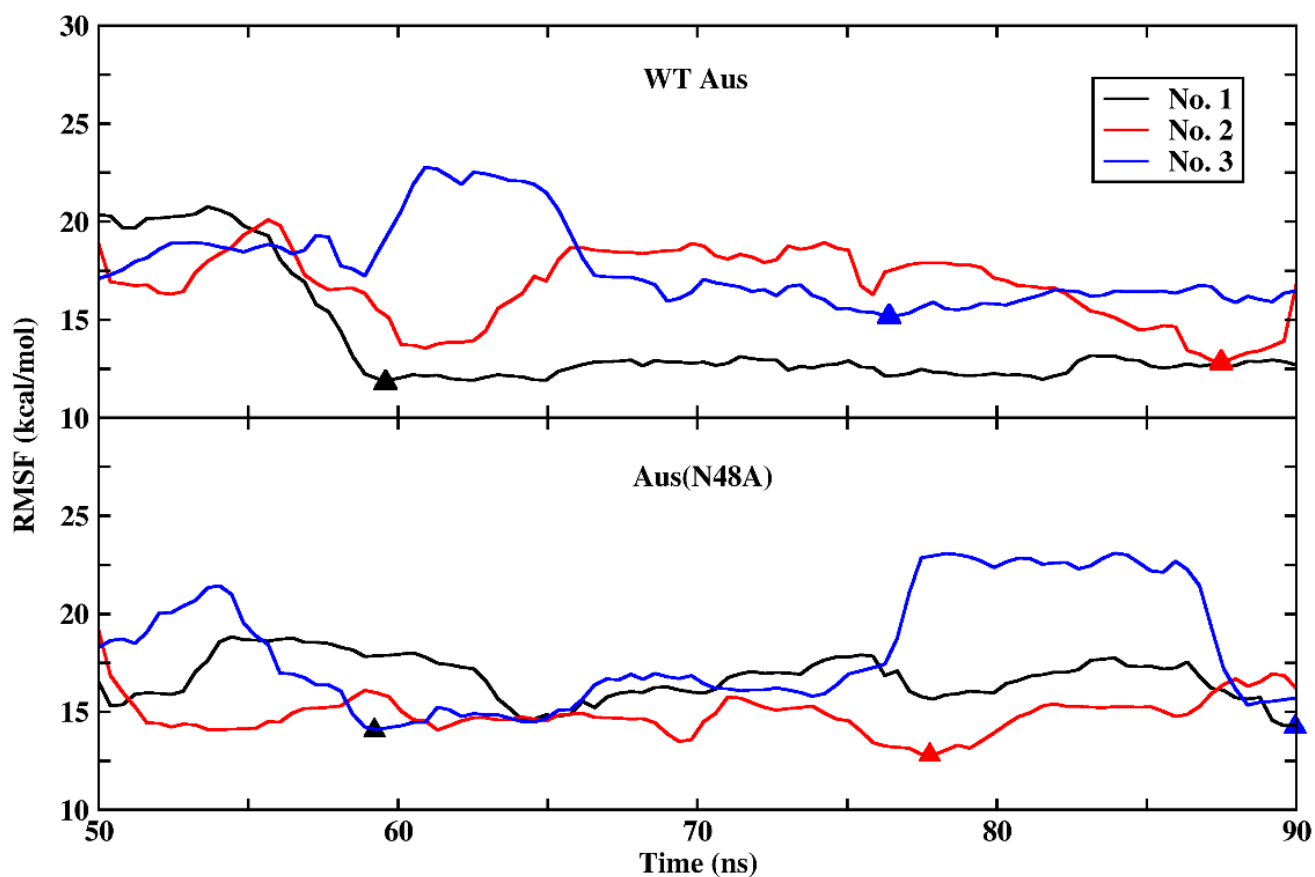

**Figure S6.** The RMSF of gas phase interaction energy of 10-ns sliding window in the last 50 ns for Aus and Aus(N48A) systems. The x-axis represents the start time of a 10-ns window. The windows with the smallest RMSF are marked with triangles.

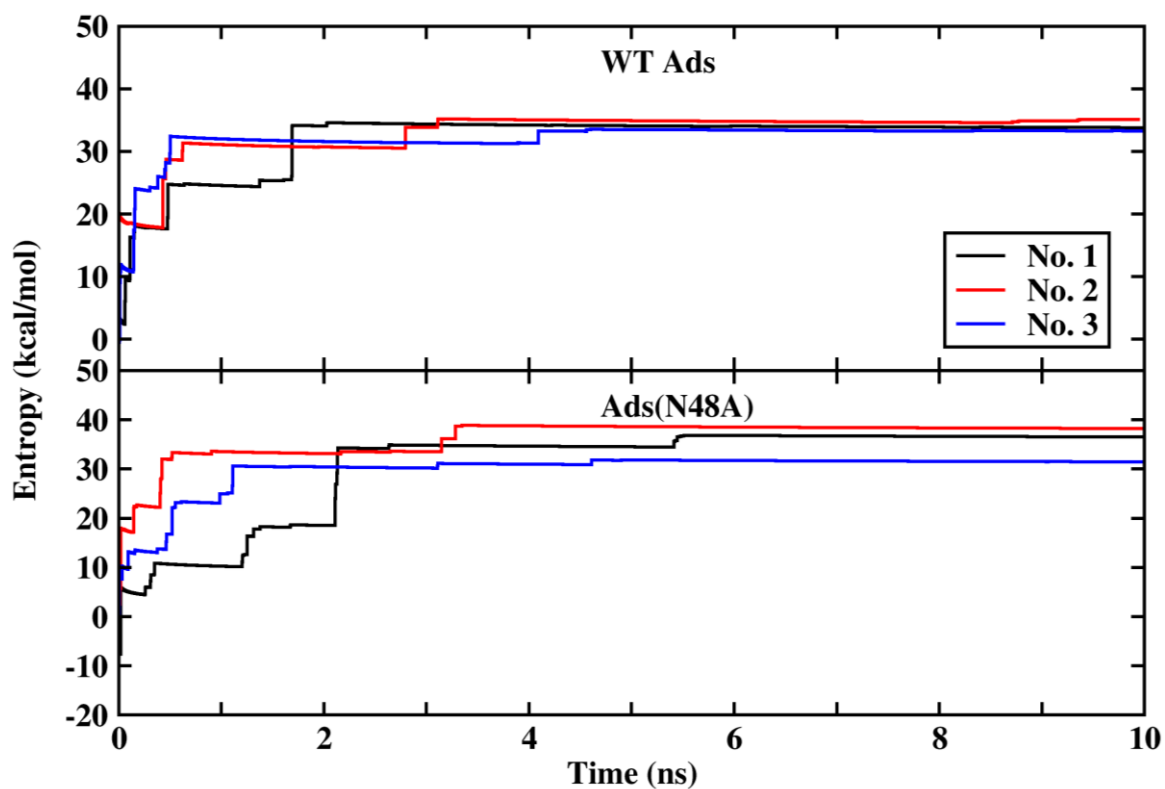

**Figure S7.** Time-averaged interaction entropy of continuous 10 ns with lowest energy fluctuation of for Ads and Ads(N48A) systems under three simulations.

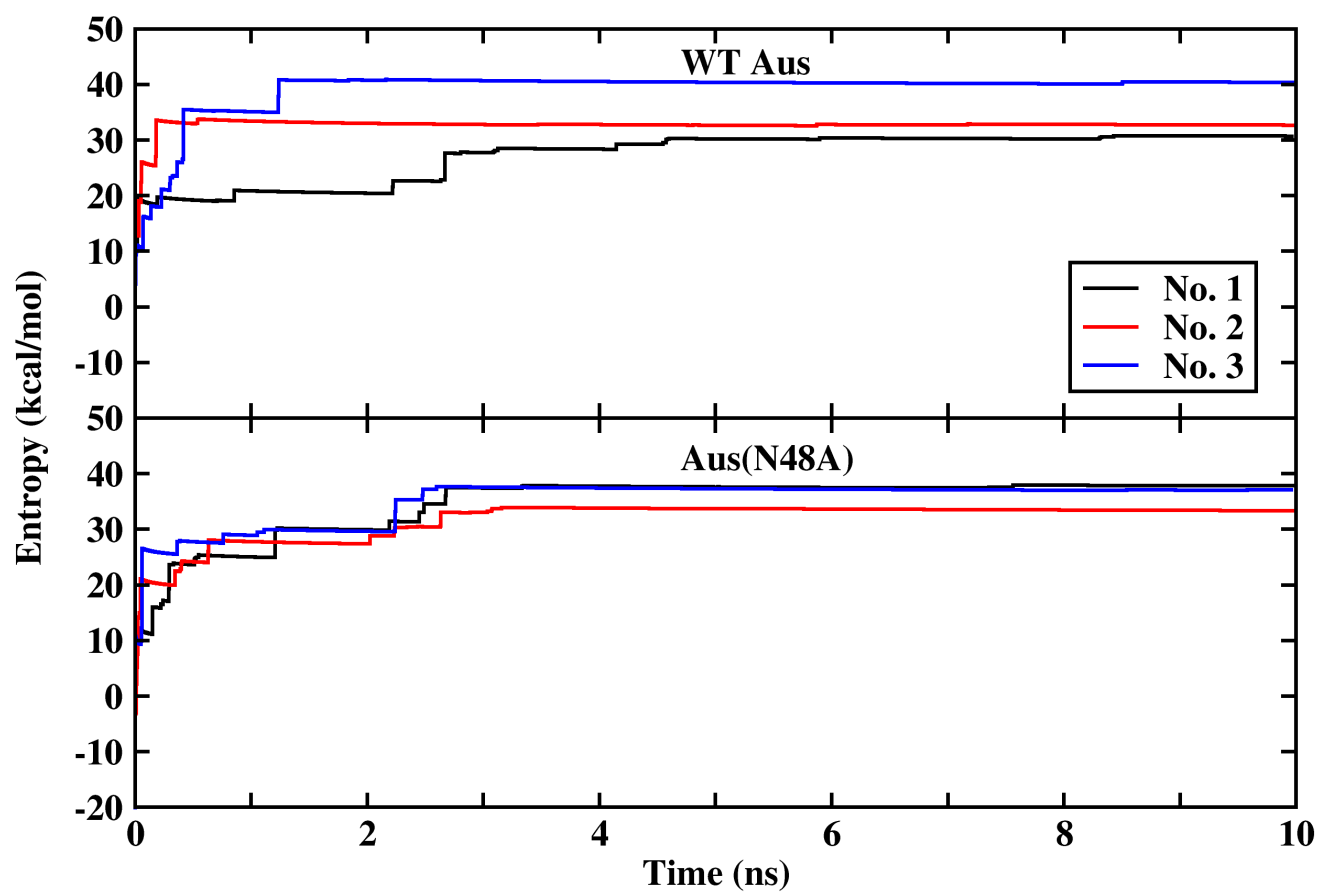

**Figure S8.** Time-averaged interaction entropy of continuous 10 ns with lowest energy fluctuation of for Aus and Aus(N48A) systems under three simulations.
